# Supplementary material for: The Predictive Value of Systemic Immune-Inflammation Index on Bladder Recurrence on Upper Tract Urothelial Carcinoma Outcomes after Radical Nephroureterectomy
Source: MDPI journal article supplement (doi:10.3390/jcm10225273), 2021-11-12
Supplement: s1 [file s1]

## Supplementary Materials

**Table S1.** Demographics and clinicopathologic characteristics of 108 patients with bladder recurrence after nephroureterectomy according to SII level.

| Variables                   | Total          | SII value     |               |                |
|-----------------------------|----------------|---------------|---------------|----------------|
|                             |                | High          | Low           | <i>p</i> value |
|                             | <i>n</i> = 108 | <i>n</i> = 70 | <i>n</i> = 38 |                |
| Age (Years)                 |                |               |               |                |
| Median (IQR)                | 69.5(16)       | 68.0(12)      | 70.2(17)      | 0.638          |
| Gender                      |                |               |               | 0.354          |
| Male                        | 56(51.9)       | 34(48.6)      | 22(57.9)      |                |
| Female                      | 52(48.1)       | 36(51.4)      | 16(42.1)      |                |
| CKD stage                   |                |               |               | 0.052          |
| Stage 1                     | 8(7.4)         | 2(2.9)        | 6(15.8)       |                |
| Stage 2                     | 22(20.4)       | 14(20.0)      | 8(21.1)       |                |
| Stage 3                     | 44(40.7)       | 28(40.0)      | 16(42.1)      |                |
| Stage 4                     | 6(5.6)         | 6(8.6)        | 0(0.0)        |                |
| Stage 5                     | 28(25.9)       | 20(28.6)      | 8(21.7)       |                |
| Bladder cancer history      |                |               |               | <b>0.044</b>   |
| Yes                         | 73(67.6)       | 52(74.3)      | 21(55.3)      |                |
| No                          | 35(32.4)       | 18(25.7)      | 17(44.7)      |                |
| Preoperative hydronephrosis |                |               |               | <b>0.018</b>   |
| Yes                         | 62(57.4)       | 46(65.7)      | 16(42.1)      |                |
| No                          | 46(42.6)       | 24(34.3)      | 22(57.9)      |                |
| Type of operation           |                |               |               | 0.226          |
| Open                        | 76(70.4)       | 52(74.3)      | 24(63.2)      |                |
| Laparoscopic                | 32(29.6)       | 18(25.7)      | 14(36.8)      |                |
| Tumor location              |                |               |               | 0.211          |
| Pyelocaliceal               | 46(42.6)       | 26(37.1)      | 20(52.6)      |                |
| Ureteral                    | 36(33.3)       | 24(34.3)      | 12(31.6)      |                |
| Both                        | 26(24.1)       | 20(28.6)      | 6(15.8)       |                |
| Multifocality               |                |               |               | 0.236          |
| Single                      | 84(77.8)       | 52(74.3)      | 32(84.2)      |                |
| Multifocal                  | 24(22.2)       | 18(25.7)      | 6(15.8)       |                |
| Pathological T stage        |                |               |               | 0.183          |
| pTis/pTa                    | 70(64.8)       | 44(62.9)      | 26(68.4)      |                |
| pT1                         | 36(33.3)       | 24(34.3)      | 12(31.6)      |                |
| pT2                         | 2(1.9)         | 2(2.9)        | 0(0.0)        |                |
| Grade                       |                |               |               | <b>0.026</b>   |
| High                        | 61(56.5)       | 45(64.4)      | 16(42.1)      |                |
| Low                         | 47(43.5)       | 25(35.7)      | 22(57.9)      |                |

CKD = Chronic kidney disease, SII = Systemic Immune-Inflammation Index. Statistically significant values are marked with Bold.

**Table S2.** Collected reports of systemic inflammatory index on upper tract urothelial carcinoma.

| Author        | Year | Study Design                   | Patients | Age (years) | SII cut-off Value | Application  | Outcome Measurement |
|---------------|------|--------------------------------|----------|-------------|-------------------|--------------|---------------------|
| Jan [22]      | 2019 | Retrospective single center    | 424      | 68.5 ± 10.9 | 580               | SII with MLR | OS, CSS, PFS        |
| Zheng [23]    | 2020 | Retrospective single center    | 525      | 67.6 ± 10.5 | 672               | SII with PNI | OS, CSS, RFS        |
| Mori [6]      | 2021 | Retrospective multiple centers | 2492     | 69          | 485               | SII          | OS, CSS, RFS        |
| Current study | 2021 | Retrospective single center    | 376      | 65.9 ± 10.8 | 485               | SII          | CSS, MFS, BRFS      |

BRFS = bladder recurrence-free survival; CSS = cancer-specific survival; MFS = metastatic-free survival; OS = overall survival; PFS = progression-free survival; PNI = prognostic nutrition index; RFS = recurrence-free survival; SII = systemic immune-inflammation index.

a. MFS

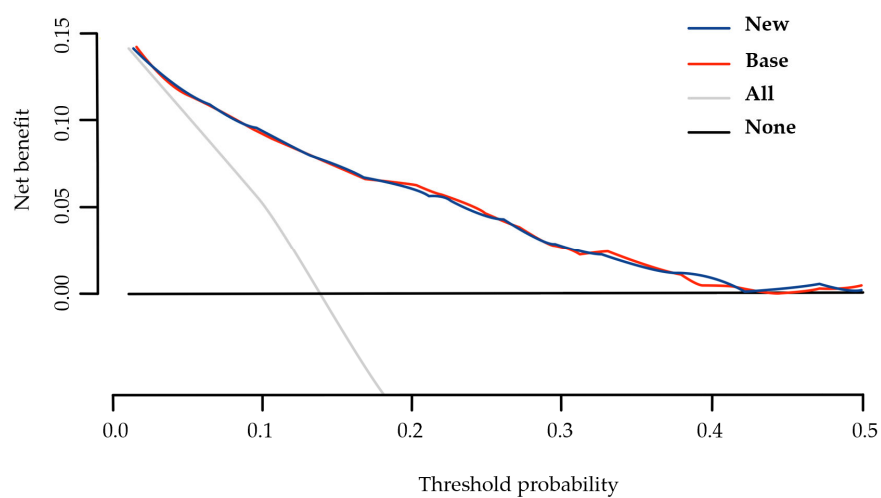

b. CSS

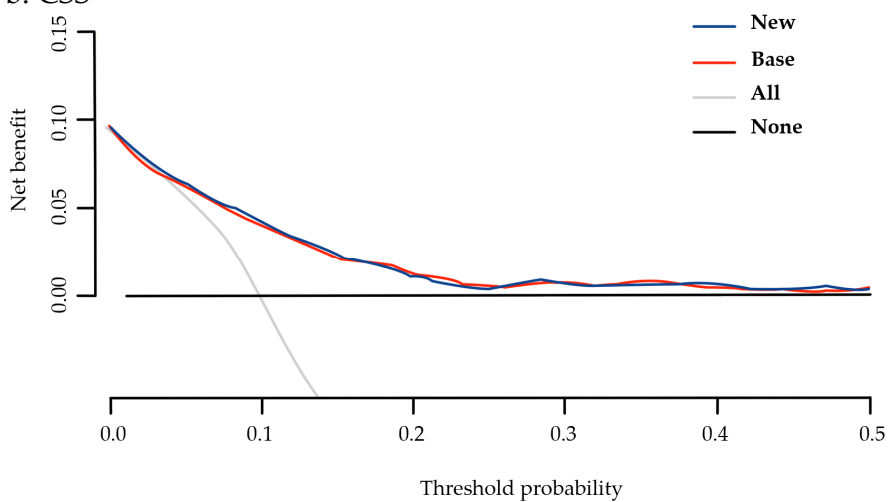

c. BRFS

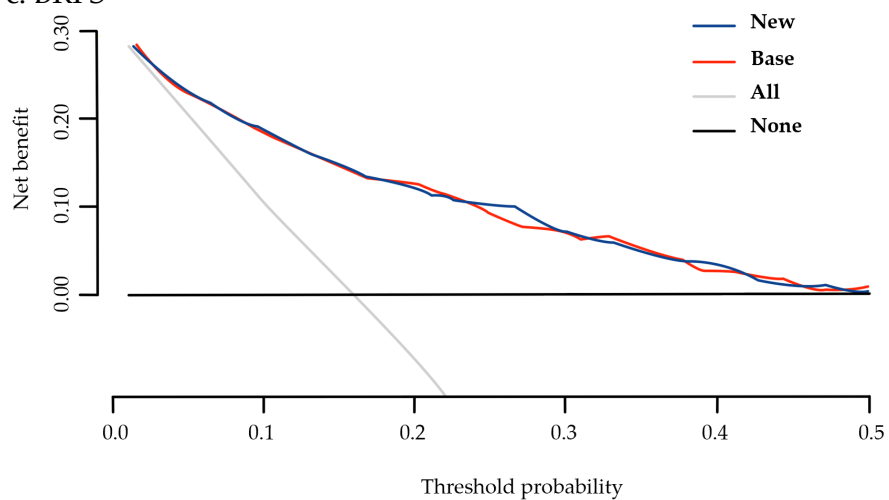

**Figure S1.** Decision curve analyses for net benefit of inclusion SII for prediction of survival (a) MFS, (b) CSS, and (c) BRFS.
